# Supplementary material
Source: PubMed Central journal article supplement (PMC4658496)
Supplement: supp_115.066175_Supplemental_66175.pdf [file supp_115.066175_Supplemental_66175.pdf]

Supplemental Data for **Drug Metabolism and Disposition**

**Atenolol Renal Secretion Is Mediated by Human Organic Cation Transporter  
2 (hOCT2) and Multidrug and Toxin Extrusion Proteins (hMATEs)**

Jia Yin, Haichuan Duan, Yoshiyuki Shirasaka<sup>1</sup>, Bhagwat Prasad, and Joanne Wang

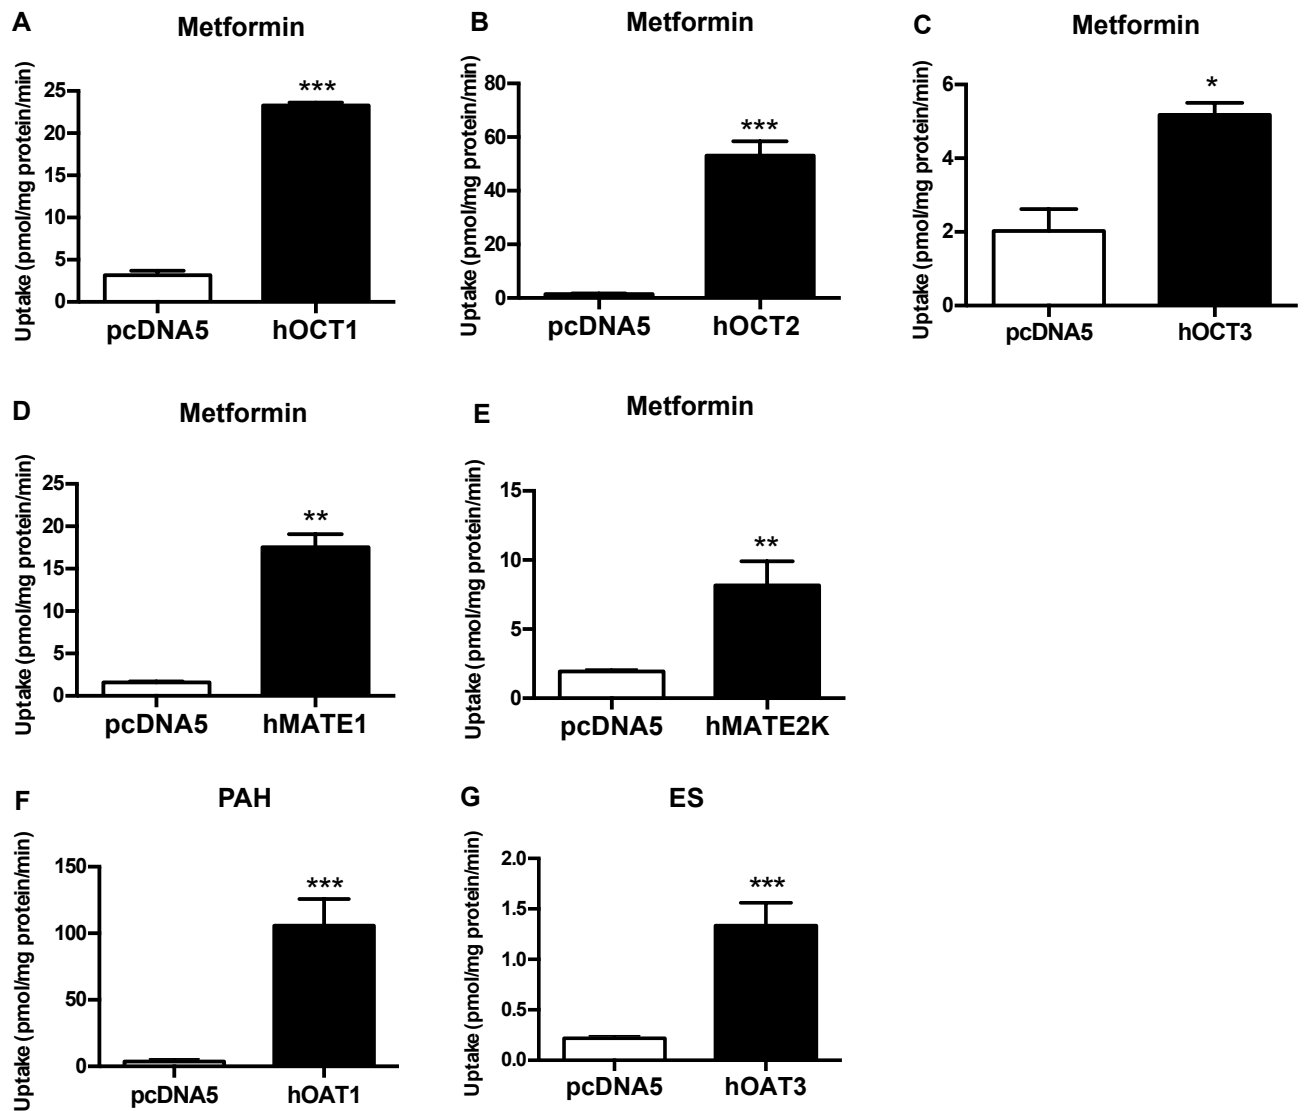

**Supplemental Figure 1. Functional characterization of HEK293 cells stably expressing selected drug transporters.** The uptake of probe substrate for each drug transporter was measured in both transporter-transfected and pcDNA5-transfected control HEK293 cells. (A) - (C): uptake of 6.1  $\mu$ M metformin for 2 min by hOCT1, hOCT2, and hOCT3. (D) and (E): uptake of 6.1  $\mu$ M metformin for 5 min by hMATE1 and hMATE2-K. (F): uptake of 2  $\mu$ M PAH for 2 min by hOAT1. (G): uptake of 0.06  $\mu$ M ES for 2 min by hOAT3. Data are presented as

mean  $\pm$  SD. Uptake in transporter-expressing cells were compared with that in control cells, \*\*\*  
P < 0.001, \*\* P < 0.01, \* P < 0.05.

**Supplemental Table 1:** Surrogate peptides of hOCT1, hOCT2, hMATE1 and hMATE2-K and their MS/MS parameters for protein quantification.

| Protein  | Compound Name  | Parent Ion | Product Ions   | Fragmentor | Collision Energy | LLOQ (fmol on column) |
|----------|----------------|------------|----------------|------------|------------------|-----------------------|
| hOCT1    | LSPSFADLFR     | 576.7      | 476.6, 855     | 25         | 16               | 0.20                  |
|          | LSPSFADLFR     | 581.8      | 778.4, 865.4   | 25         | 23               |                       |
| hOCT2    | LNPSFLDLVR     | 587.34     | 228.13, 946.54 | 140        | 15               | 0.62                  |
|          | LNPSFLDLVR     | 592.34     | 228.13, 956.54 | 140        | 15               |                       |
| hMATE1   | GGPEATLEVR     | 514.9      | 617.3, 817.6   | 130        | 14               | 0.64                  |
|          | GGPEATLEVR     | 519.9      | 827.6, 627.3   | 130        | 15               |                       |
| hMATE2-K | TPEEAHALSAPTSR | 489.7      | 618.3, 460.2   | 130        | 15               | 2.50                  |
|          | TPEEAHALSAPTSR | 494.7      | 628.3, 470.2   | 130        | 15               |                       |

**Supplemental Table 2:** Comparison of  $K_m$  and  $V_{max}$  values derived from Michaelis-Menten (MM) equation and MM with a diffusional component.

| Transporter | MM fitting <sup>a</sup> |                                       |        | MM with diffusional component fitting <sup>b</sup> |                                       |        |
|-------------|-------------------------|---------------------------------------|--------|----------------------------------------------------|---------------------------------------|--------|
|             | $K_m$ ( $\mu$ M)        | $V_{max}$<br>(pmol/min/mg<br>protein) | $R^2$  | $K_m$ ( $\mu$ M)                                   | $V_{max}$<br>(pmol/min/mg<br>protein) | $R^2$  |
| hOCT1       | 128 $\pm$ 16            | 1355 $\pm$ 40                         | 0.9404 | 128 $\pm$ 50                                       | 1356 $\pm$ 156                        | 0.9404 |
| hOCT2       | 280 $\pm$ 41            | 1836 $\pm$ 71                         | 0.9715 | 278 $\pm$ 120                                      | 1838 $\pm$ 284                        | 0.9714 |
| hMATE1      | 32 $\pm$ 5              | 323 $\pm$ 12                          | 0.9641 | 37 $\pm$ 9                                         | 318 $\pm$ 17                          | 0.9630 |
| hMATE2-K    | 76 $\pm$ 14             | 500 $\pm$ 22                          | 0.9730 | 78 $\pm$ 21                                        | 500 $\pm$ 26                          | 0.9730 |

<sup>a</sup>. Data are fitted to  $V = V_{max} * S / (K_m + S)$  where  $V$  is the velocity of uptake,  $V_{max}$  is the maximum velocity of uptake,  $S$  is the substrate concentration, and  $K_m$  is the Michaelis-Menten constant. <sup>b</sup>. Data are fitted to  $V = V_{max} * S / (K_m + S) + P_{dif} * S$  where a first order diffusional process is included. The  $P_{dif}$  is the nonsaturable passive diffusion rate constant.
